# Supplementary material
Source: PubMed Central journal article supplement (PMC1702379)
Supplement: rspb20063737s09.pdf [file rspb20063737s09.pdf]

| <b>French Frigate Shoals - Males</b> |     |          |       |       |       |     |          |       |       |       |      |          |       |       |       |
|--------------------------------------|-----|----------|-------|-------|-------|-----|----------|-------|-------|-------|------|----------|-------|-------|-------|
| Year                                 | Age | Survival | s.e.  | LCL   | UCL   | Age | Survival | s.e.  | LCL   | UCL   | Age  | Survival | s.e.  | LCL   | UCL   |
| 1984                                 | 1-2 | 0.900    | 0.049 | 0.757 | 0.963 |     |          |       |       |       |      |          |       |       |       |
| 1985                                 | 1-2 | 0.955    | 0.021 | 0.892 | 0.982 |     |          |       |       |       |      |          |       |       |       |
| 1986                                 | 1-2 | 0.920    | 0.023 | 0.861 | 0.955 | 3-4 | 0.915    | 0.049 | 0.758 | 0.974 |      |          |       |       |       |
| 1987                                 | 1-2 | 0.913    | 0.023 | 0.855 | 0.949 | 3-4 | 0.938    | 0.027 | 0.859 | 0.974 |      |          |       |       |       |
| 1988                                 | 1-2 | 0.848    | 0.029 | 0.782 | 0.896 | 3-4 | 0.879    | 0.032 | 0.802 | 0.929 | 5-17 | 1.000    | 0.000 | 1.000 | 1.000 |
| 1989                                 | 1-2 | 0.714    | 0.037 | 0.636 | 0.781 | 3-4 | 0.732    | 0.039 | 0.648 | 0.801 | 5-17 | 0.911    | 0.033 | 0.822 | 0.957 |
| 1990                                 | 1-2 | 0.639    | 0.046 | 0.546 | 0.724 | 3-4 | 0.755    | 0.042 | 0.664 | 0.828 | 5-17 | 0.882    | 0.031 | 0.807 | 0.930 |
| 1991                                 | 1-2 | 0.401    | 0.052 | 0.305 | 0.505 | 3-4 | 0.645    | 0.053 | 0.535 | 0.741 | 5-17 | 0.857    | 0.029 | 0.790 | 0.905 |
| 1992                                 | 1-2 | 0.525    | 0.053 | 0.421 | 0.627 | 3-4 | 0.695    | 0.076 | 0.531 | 0.821 | 5-17 | 0.891    | 0.026 | 0.830 | 0.933 |
| 1993                                 | 1-2 | 0.347    | 0.047 | 0.262 | 0.443 | 3-4 | 0.550    | 0.108 | 0.342 | 0.742 | 5-17 | 0.809    | 0.031 | 0.740 | 0.862 |
| 1994                                 | 1-2 | 0.346    | 0.046 | 0.262 | 0.441 | 3-4 | 0.601    | 0.100 | 0.399 | 0.773 | 5-17 | 0.896    | 0.028 | 0.828 | 0.939 |
| 1995                                 | 1-2 | 0.334    | 0.057 | 0.233 | 0.454 | 3-4 | 0.737    | 0.093 | 0.522 | 0.878 | 5-17 | 0.799    | 0.035 | 0.721 | 0.859 |
| 1996                                 | 1-2 | 0.491    | 0.058 | 0.381 | 0.603 | 3-4 | 0.701    | 0.113 | 0.449 | 0.871 | 5-17 | 0.916    | 0.026 | 0.848 | 0.955 |
| 1997                                 | 1-2 | 0.185    | 0.042 | 0.116 | 0.280 | 3-4 | 0.601    | 0.124 | 0.353 | 0.806 | 5-17 | 0.917    | 0.026 | 0.850 | 0.956 |
| 1998                                 | 1-2 | 0.510    | 0.054 | 0.406 | 0.613 | 3-4 | 0.852    | 0.105 | 0.529 | 0.967 | 5-17 | 0.969    | 0.018 | 0.904 | 0.991 |
| 1999                                 | 1-2 | 0.616    | 0.051 | 0.513 | 0.709 | 3-4 | 0.708    | 0.141 | 0.388 | 0.902 | 5-17 | 0.877    | 0.031 | 0.802 | 0.927 |
| 2000                                 | 1-2 | 0.358    | 0.049 | 0.268 | 0.458 | 3-4 | 0.582    | 0.100 | 0.384 | 0.757 | 5-17 | 0.951    | 0.023 | 0.882 | 0.980 |
| 2001                                 | 1-2 | 0.411    | 0.061 | 0.299 | 0.534 | 3-4 | 0.679    | 0.092 | 0.481 | 0.828 | 5-17 | 0.880    | 0.034 | 0.795 | 0.932 |
| 2002                                 | 1-2 | 0.552    | 0.060 | 0.433 | 0.665 | 3-4 | 0.841    | 0.085 | 0.603 | 0.949 | 5-17 | 0.894    | 0.034 | 0.808 | 0.944 |
| 2003                                 | 1-2 | 0.558    | 0.063 | 0.433 | 0.676 | 3-4 | 0.793    | 0.113 | 0.500 | 0.936 | 5-17 | 1.000    | 0.000 | 1.000 | 1.000 |

| <b>French Frigate Shoals - Females</b> |     |          |       |       |       |     |          |       |       |       |      |          |       |       |       |
|----------------------------------------|-----|----------|-------|-------|-------|-----|----------|-------|-------|-------|------|----------|-------|-------|-------|
| Year                                   | Age | Survival | s.e.  | LCL   | UCL   | Age | Survival | s.e.  | LCL   | UCL   | Age  | Survival | s.e.  | LCL   | UCL   |
| 1984                                   | 1-2 | 0.925    | 0.038 | 0.809 | 0.973 |     |          |       |       |       |      |          |       |       |       |
| 1985                                   | 1-2 | 0.967    | 0.016 | 0.918 | 0.987 |     |          |       |       |       |      |          |       |       |       |
| 1986                                   | 1-2 | 0.940    | 0.018 | 0.894 | 0.967 | 3-4 | 0.936    | 0.038 | 0.810 | 0.981 |      |          |       |       |       |
| 1987                                   | 1-2 | 0.935    | 0.018 | 0.889 | 0.962 | 3-4 | 0.954    | 0.021 | 0.892 | 0.981 |      |          |       |       |       |
| 1988                                   | 1-2 | 0.883    | 0.023 | 0.829 | 0.922 | 3-4 | 0.908    | 0.025 | 0.846 | 0.947 | 5-17 | 1.000    | 0.000 | 1.000 | 1.000 |
| 1989                                   | 1-2 | 0.772    | 0.032 | 0.703 | 0.829 | 3-4 | 0.787    | 0.033 | 0.715 | 0.846 | 5-17 | 0.933    | 0.025 | 0.862 | 0.968 |
| 1990                                   | 1-2 | 0.707    | 0.042 | 0.619 | 0.781 | 3-4 | 0.808    | 0.036 | 0.728 | 0.868 | 5-17 | 0.910    | 0.024 | 0.850 | 0.948 |
| 1991                                   | 1-2 | 0.476    | 0.054 | 0.374 | 0.581 | 3-4 | 0.712    | 0.048 | 0.610 | 0.796 | 5-17 | 0.891    | 0.023 | 0.836 | 0.928 |
| 1992                                   | 1-2 | 0.601    | 0.051 | 0.499 | 0.695 | 3-4 | 0.756    | 0.066 | 0.605 | 0.862 | 5-17 | 0.918    | 0.020 | 0.869 | 0.950 |
| 1993                                   | 1-2 | 0.420    | 0.050 | 0.326 | 0.520 | 3-4 | 0.625    | 0.102 | 0.415 | 0.796 | 5-17 | 0.852    | 0.025 | 0.795 | 0.895 |
| 1994                                   | 1-2 | 0.418    | 0.050 | 0.325 | 0.518 | 3-4 | 0.672    | 0.091 | 0.476 | 0.821 | 5-17 | 0.921    | 0.022 | 0.867 | 0.954 |
| 1995                                   | 1-2 | 0.406    | 0.062 | 0.291 | 0.531 | 3-4 | 0.792    | 0.079 | 0.598 | 0.907 | 5-17 | 0.843    | 0.029 | 0.778 | 0.892 |
| 1996                                   | 1-2 | 0.568    | 0.057 | 0.455 | 0.674 | 3-4 | 0.761    | 0.098 | 0.525 | 0.902 | 5-17 | 0.937    | 0.020 | 0.883 | 0.966 |
| 1997                                   | 1-2 | 0.235    | 0.050 | 0.152 | 0.346 | 3-4 | 0.672    | 0.114 | 0.427 | 0.850 | 5-17 | 0.938    | 0.020 | 0.885 | 0.967 |
| 1998                                   | 1-2 | 0.586    | 0.052 | 0.481 | 0.683 | 3-4 | 0.887    | 0.084 | 0.604 | 0.976 | 5-17 | 0.977    | 0.014 | 0.928 | 0.993 |
| 1999                                   | 1-2 | 0.685    | 0.047 | 0.588 | 0.769 | 3-4 | 0.767    | 0.122 | 0.464 | 0.926 | 5-17 | 0.907    | 0.025 | 0.846 | 0.945 |
| 2000                                   | 1-2 | 0.431    | 0.052 | 0.333 | 0.534 | 3-4 | 0.655    | 0.093 | 0.458 | 0.810 | 5-17 | 0.963    | 0.017 | 0.910 | 0.985 |
| 2001                                   | 1-2 | 0.487    | 0.063 | 0.367 | 0.609 | 3-4 | 0.742    | 0.080 | 0.558 | 0.867 | 5-17 | 0.909    | 0.027 | 0.840 | 0.949 |
| 2002                                   | 1-2 | 0.626    | 0.057 | 0.510 | 0.729 | 3-4 | 0.878    | 0.068 | 0.674 | 0.962 | 5-17 | 0.920    | 0.026 | 0.852 | 0.958 |
| 2003                                   | 1-2 | 0.632    | 0.059 | 0.511 | 0.738 | 3-4 | 0.839    | 0.093 | 0.576 | 0.952 | 5-17 | 1.000    | 0.000 | 1.000 | 1.000 |

| <b>Laysan and Lisianski Islands (age 1-2 yr rates apply only to Laysan Island)</b> |     |          |       |       |       |     |          |       |       |       |      |          |       |       |       |
|------------------------------------------------------------------------------------|-----|----------|-------|-------|-------|-----|----------|-------|-------|-------|------|----------|-------|-------|-------|
| Year                                                                               | Age | Survival | s.e.  | LCL   | UCL   | Age | Survival | s.e.  | LCL   | UCL   | Age  | Survival | s.e.  | LCL   | UCL   |
| 1984                                                                               | 1-2 | 0.928    | 0.050 | 0.746 | 0.983 |     |          |       |       |       |      |          |       |       |       |
| 1985                                                                               | 1-2 | 0.827    | 0.053 | 0.699 | 0.908 |     |          |       |       |       |      |          |       |       |       |
| 1986                                                                               | 1-2 | 0.827    | 0.053 | 0.699 | 0.908 | 3-4 | 0.975    | 0.028 | 0.803 | 0.997 |      |          |       |       |       |
| 1987                                                                               | 1-2 | 0.928    | 0.037 | 0.815 | 0.974 | 3-4 | 0.845    | 0.053 | 0.713 | 0.923 |      |          |       |       |       |
| 1988                                                                               | 1-2 | 0.652    | 0.061 | 0.527 | 0.760 | 3-4 | 0.784    | 0.057 | 0.652 | 0.875 | 5-17 | 0.882    | 0.063 | 0.695 | 0.961 |
| 1989                                                                               | 1-2 | 0.518    | 0.069 | 0.384 | 0.650 | 3-4 | 0.803    | 0.057 | 0.668 | 0.892 | 5-17 | 0.840    | 0.062 | 0.680 | 0.929 |
| 1990                                                                               | 1-2 | 0.781    | 0.073 | 0.606 | 0.892 | 3-4 | 0.850    | 0.052 | 0.717 | 0.927 | 5-17 | 0.878    | 0.040 | 0.775 | 0.938 |
| 1991                                                                               | 1-2 | 0.868    | 0.052 | 0.729 | 0.941 | 3-4 | 1.000    | 0.000 | 1.000 | 1.000 | 5-17 | 0.948    | 0.026 | 0.867 | 0.980 |
| 1992                                                                               | 1-2 | 0.714    | 0.059 | 0.585 | 0.815 | 3-4 | 0.720    | 0.075 | 0.554 | 0.843 | 5-17 | 0.883    | 0.033 | 0.800 | 0.934 |
| 1993                                                                               | 1-2 | 0.466    | 0.066 | 0.342 | 0.594 | 3-4 | 0.905    | 0.046 | 0.768 | 0.965 | 5-17 | 0.983    | 0.018 | 0.877 | 0.998 |
| 1994                                                                               | 1-2 | 0.662    | 0.060 | 0.536 | 0.769 | 3-4 | 0.877    | 0.049 | 0.746 | 0.945 | 5-17 | 0.904    | 0.031 | 0.824 | 0.949 |
| 1995                                                                               | 1-2 | 0.656    | 0.058 | 0.535 | 0.760 | 3-4 | 0.773    | 0.067 | 0.618 | 0.877 | 5-17 | 0.960    | 0.018 | 0.906 | 0.983 |
| 1996                                                                               | 1-2 | 0.711    | 0.055 | 0.593 | 0.806 | 3-4 | 0.947    | 0.036 | 0.811 | 0.987 | 5-17 | 0.955    | 0.018 | 0.903 | 0.980 |
| 1997                                                                               | 1-2 | 0.801    | 0.050 | 0.685 | 0.882 | 3-4 | 0.935    | 0.037 | 0.815 | 0.979 | 5-17 | 0.957    | 0.017 | 0.908 | 0.981 |
| 1998                                                                               | 1-2 | 0.783    | 0.050 | 0.670 | 0.865 | 3-4 | 0.911    | 0.038 | 0.802 | 0.963 | 5-17 | 0.974    | 0.013 | 0.933 | 0.990 |
| 1999                                                                               | 1-2 | 0.819    | 0.042 | 0.722 | 0.888 | 3-4 | 0.882    | 0.043 | 0.770 | 0.943 | 5-17 | 0.966    | 0.014 | 0.925 | 0.985 |
| 2000                                                                               | 1-2 | 0.626    | 0.056 | 0.511 | 0.728 | 3-4 | 0.817    | 0.048 | 0.704 | 0.893 | 5-17 | 0.959    | 0.014 | 0.920 | 0.980 |
| 2001                                                                               | 1-2 | 0.530    | 0.071 | 0.391 | 0.664 | 3-4 | 0.867    | 0.039 | 0.769 | 0.927 | 5-17 | 0.933    | 0.018 | 0.887 | 0.961 |
| 2002                                                                               | 1-2 | 0.882    | 0.043 | 0.769 | 0.943 | 3-4 | 0.883    | 0.049 | 0.748 | 0.951 | 5-17 | 0.945    | 0.016 | 0.904 | 0.970 |
| 2003                                                                               | 1-2 | 0.749    | 0.057 | 0.622 | 0.844 | 3-4 | 0.896    | 0.062 | 0.701 | 0.969 | 5-17 | 0.972    | 0.012 | 0.935 | 0.988 |

| <b>Pearl and Hermes Reef, Midway Atoll and Kure Atoll (also Lisianski Island age 1-2 yr)</b> |     |          |       |       |       |     |          |       |       |       |      |          |       |       |       |
|----------------------------------------------------------------------------------------------|-----|----------|-------|-------|-------|-----|----------|-------|-------|-------|------|----------|-------|-------|-------|
| Year                                                                                         | Age | Survival | s.e.  | LCL   | UCL   | Age | Survival | s.e.  | LCL   | UCL   | Age  | Survival | s.e.  | LCL   | UCL   |
| 1984                                                                                         | 1-2 | 0.942    | 0.040 | 0.793 | 0.985 |     |          |       |       |       |      |          |       |       |       |
| 1985                                                                                         | 1-2 | 0.898    | 0.038 | 0.796 | 0.952 |     |          |       |       |       |      |          |       |       |       |
| 1986                                                                                         | 1-2 | 0.907    | 0.036 | 0.808 | 0.958 | 3-4 | 0.859    | 0.093 | 0.574 | 0.965 |      |          |       |       |       |
| 1987                                                                                         | 1-2 | 0.831    | 0.052 | 0.706 | 0.910 | 3-4 | 0.967    | 0.033 | 0.798 | 0.995 |      |          |       |       |       |
| 1988                                                                                         | 1-2 | 0.927    | 0.038 | 0.807 | 0.975 | 3-4 | 1.000    | 0.000 | 1.000 | 1.000 | 5-17 | 1.000    | 0.000 | 1.000 | 1.000 |
| 1989                                                                                         | 1-2 | 0.902    | 0.046 | 0.770 | 0.962 | 3-4 | 0.953    | 0.042 | 0.765 | 0.992 | 5-17 | 1.000    | 0.000 | 1.000 | 1.000 |
| 1990                                                                                         | 1-2 | 0.893    | 0.049 | 0.755 | 0.958 | 3-4 | 0.964    | 0.034 | 0.796 | 0.995 | 5-17 | 1.000    | 0.000 | 1.000 | 1.000 |
| 1991                                                                                         | 1-2 | 0.864    | 0.040 | 0.766 | 0.925 | 3-4 | 1.000    | 0.000 | 1.000 | 1.000 | 5-17 | 0.959    | 0.028 | 0.851 | 0.989 |
| 1992                                                                                         | 1-2 | 0.894    | 0.031 | 0.816 | 0.941 | 3-4 | 0.916    | 0.057 | 0.719 | 0.979 | 5-17 | 0.935    | 0.029 | 0.848 | 0.974 |
| 1993                                                                                         | 1-2 | 0.919    | 0.044 | 0.781 | 0.973 | 3-4 | 1.000    | 0.015 | 1.000 | 1.000 | 5-17 | 1.000    | 0.000 | 1.000 | 1.000 |
| 1994                                                                                         | 1-2 | 0.617    | 0.072 | 0.470 | 0.745 | 3-4 | 0.951    | 0.032 | 0.835 | 0.986 | 5-17 | 0.982    | 0.016 | 0.902 | 0.997 |
| 1995                                                                                         | 1-2 | 0.633    | 0.058 | 0.514 | 0.738 | 3-4 | 0.922    | 0.039 | 0.804 | 0.972 | 5-17 | 0.893    | 0.029 | 0.822 | 0.938 |
| 1996                                                                                         | 1-2 | 0.645    | 0.047 | 0.548 | 0.731 | 3-4 | 0.948    | 0.054 | 0.683 | 0.994 | 5-17 | 0.949    | 0.020 | 0.893 | 0.976 |
| 1997                                                                                         | 1-2 | 0.679    | 0.046 | 0.584 | 0.762 | 3-4 | 0.894    | 0.059 | 0.712 | 0.966 | 5-17 | 0.961    | 0.017 | 0.910 | 0.984 |
| 1998                                                                                         | 1-2 | 0.766    | 0.038 | 0.685 | 0.832 | 3-4 | 0.912    | 0.045 | 0.777 | 0.968 | 5-17 | 0.936    | 0.021 | 0.880 | 0.967 |
| 1999                                                                                         | 1-2 | 0.758    | 0.036 | 0.680 | 0.822 | 3-4 | 0.910    | 0.044 | 0.777 | 0.967 | 5-17 | 0.985    | 0.011 | 0.936 | 0.996 |
| 2000                                                                                         | 1-2 | 0.561    | 0.045 | 0.472 | 0.647 | 3-4 | 0.858    | 0.043 | 0.751 | 0.923 | 5-17 | 0.923    | 0.021 | 0.870 | 0.956 |
| 2001                                                                                         | 1-2 | 0.363    | 0.049 | 0.273 | 0.464 | 3-4 | 0.802    | 0.051 | 0.684 | 0.883 | 5-17 | 0.952    | 0.018 | 0.902 | 0.977 |
| 2002                                                                                         | 1-2 | 0.407    | 0.051 | 0.311 | 0.510 | 3-4 | 0.869    | 0.065 | 0.685 | 0.953 | 5-17 | 0.912    | 0.022 | 0.857 | 0.947 |
| 2003                                                                                         | 1-2 | 0.598    | 0.050 | 0.498 | 0.690 | 3-4 | 0.935    | 0.074 | 0.574 | 0.993 | 5-17 | 0.942    | 0.026 | 0.863 | 0.977 |

| <b>All sites</b> |       |          |       |       |       |
|------------------|-------|----------|-------|-------|-------|
| Year             | Age   | Survival | s.e.  | LCL   | UCL   |
| 2001-2003        | 18-20 | 0.847    | 0.029 | 0.781 | 0.900 |
